# Supplementary material
Source: MDPI journal article supplement (https://www.mdpi.com/1999-4907/14/11/2224)
Supplement: s1 [file s1]

**Table S1** Error matrices for the L1 base and ensemble classifiers.

|             |        |            |                  |        |            |
|-------------|--------|------------|------------------|--------|------------|
| <b>RF</b>   | Forest | Non-forest | <b>Plurality</b> | Forest | Non-forest |
| Forest      | 2377   | 139        | Forest           | 3558   | 37         |
| Non-forest  | 213    | 2100       | Non-forest       | 49     | 3425       |
| <b>SVM</b>  | Forest | Non-forest | <b>LOP-ICSI</b>  | Forest | Non-forest |
| Forest      | 2380   | 136        | Forest           | 3552   | 43         |
| Non-forest  | 234    | 2079       | Non-forest       | 59     | 3415       |
| <b>KNN</b>  | Forest | Non-forest | <b>LOP-PA</b>    | Forest | Non-forest |
| Forest      | 1862   | 654        | Forest           | 3549   | 46         |
| Non-forest  | 73     | 2240       | Non-forest       | 58     | 416        |
| <b>CART</b> | Forest | Non-forest | <b>LOP-UA</b>    | Forest | Non-forest |
| Forest      | 2271   | 245        | Forest           | 3551   | 44         |
| Non-forest  | 311    | 2002       | Non-forest       | 58     | 3416       |
| <b>GTB</b>  | Forest | Non-forest | <b>Stack-RF</b>  | Forest | Non-forest |
| Forest      | 2402   | 114        | Forest           | 4239   | 288        |
| Non-forest  | 293    | 2020       | Non-forest       | 272    | 4375       |

**Table S2** Error matrices for the L2 base and ensemble classifiers.

| <b>RF</b>        | Deciduous forest | Evergreen forest | Shrubs |
|------------------|------------------|------------------|--------|
| Deciduous forest | 540              | 73               | 32     |
| Evergreen forest | 70               | 598              | 103    |
| Shrubs           | 42               | 24               | 515    |

| <b>SVM</b>              | Deciduous forest | Evergreen forest | Shrubs |
|-------------------------|------------------|------------------|--------|
| <b>Deciduous forest</b> | 530              | 81               | 34     |
| <b>Evergreen forest</b> | 65               | 627              | 79     |
| <b>Shrubs</b>           | 35               | 23               | 523    |

| <b>KNN</b>       | Deciduous forest | Evergreen forest | Shrubs |
|------------------|------------------|------------------|--------|
| Deciduous forest | 603              | 41               | 1      |
| Evergreen forest | 161              | 598              | 12     |
| Shrubs           | 263              | 50               | 268    |

| <b>CART</b>      | Deciduous forest | Evergreen forest | Shrubs |
|------------------|------------------|------------------|--------|
| Deciduous forest | 466              | 103              | 76     |
| Evergreen forest | 81               | 557              | 133    |

| <b>Plurality</b>        | Deciduous forest | Evergreen forest | Shrubs |
|-------------------------|------------------|------------------|--------|
| <b>Deciduous forest</b> | 763              | 9                | 8      |
| <b>Evergreen forest</b> | 10               | 750              | 23     |
| <b>Shrubs</b>           | 96               | 25               | 661    |

| <b>LOP-ICSI</b>         | Deciduous forest | Evergreen forest | Shrubs |
|-------------------------|------------------|------------------|--------|
| <b>Deciduous forest</b> | 751              | 13               | 16     |
| <b>Evergreen forest</b> | 5                | 756              | 22     |
| <b>Shrubs</b>           | 83               | 26               | 673    |

| <b>LOP-PA</b>    | Deciduous forest | Evergreen forest | Shrubs |
|------------------|------------------|------------------|--------|
| Deciduous forest | 753              | 11               | 16     |
| Evergreen forest | 8                | 744              | 31     |
| Shrubs           | 89               | 23               | 670    |

| <b>LOP-UA</b>    | Deciduous forest | Evergreen forest | Shrubs |
|------------------|------------------|------------------|--------|
| Deciduous forest | 747              | 14               | 19     |
| Evergreen forest | 6                | 752              | 25     |

|                  |                  |                  |        |
|------------------|------------------|------------------|--------|
| Shrubs           | 101              | 53               | 427    |
| <b>GTB</b>       | Deciduous forest | Evergreen forest | Shrubs |
| Deciduous forest | 523              | 85               | 37     |
| Evergreen forest | 68               | 595              | 108    |
| Shrubs           | 48               | 28               | 505    |

|                  |                  |                  |        |
|------------------|------------------|------------------|--------|
| Shrubs           | 81               | 26               | 675    |
| <b>Stack-RF</b>  | Deciduous forest | Evergreen forest | Shrubs |
| Deciduous forest | 786              | 55               | 67     |
| Evergreen forest | 141              | 638              | 117    |
| Shrubs           | 94               | 42               | 741    |

**Table S3** Error matrices for the L3 base and ensemble classifiers.

| <b>RF</b>      | Oak | Mixed | Norway spruce | Scots pine | Beech | Black pine | Calabrian pine | Riverine | Maritime pine |
|----------------|-----|-------|---------------|------------|-------|------------|----------------|----------|---------------|
| Oak            | 247 | 0     | 0             | 1          | 7     | 24         | 1              | 0        | 1             |
| Mixed          | 1   | 33    | 48            | 30         | 18    | 0          | 0              | 0        | 0             |
| Norway spruce  | 0   | 28    | 231           | 1          | 6     | 0          | 0              | 0        | 0             |
| Scots pine     | 0   | 1     | 4             | 117        | 5     | 13         | 2              | 0        | 0             |
| Beech          | 13  | 0     | 1             | 1          | 155   | 5          | 0              | 0        | 0             |
| Black pine     | 37  | 0     | 0             | 11         | 5     | 198        | 19             | 1        | 2             |
| Calabrian pine | 22  | 1     | 0             | 5          | 3     | 24         | 149            | 0        | 28            |
| Riverine       | 4   | 0     | 0             | 0          | 0     | 2          | 12             | 139      | 0             |
| Maritime pine  | 8   | 0     | 0             | 4          | 0     | 55         | 60             | 0        | 53            |

  

| <b>SVM</b>     | Oak | Mixed | Norway spruce | Scots pine | Beech | Black pine | Calabrian pine | Riverine | Maritime pine |
|----------------|-----|-------|---------------|------------|-------|------------|----------------|----------|---------------|
| Oak            | 253 | 1     | 0             | 0          | 8     | 17         | 0              | 2        | 0             |
| Mixed          | 1   | 31    | 48            | 34         | 15    | 0          | 1              | 0        | 0             |
| Norway spruce  | 0   | 32    | 229           | 2          | 3     | 0          | 0              | 0        | 0             |
| Scots pine     | 0   | 1     | 8             | 124        | 7     | 2          | 0              | 0        | 0             |
| Beech          | 4   | 0     | 0             | 2          | 160   | 9          | 0              | 0        | 0             |
| Black pine     | 32  | 0     | 0             | 2          | 5     | 214        | 18             | 1        | 1             |
| Calabrian pine | 22  | 0     | 0             | 0          | 0     | 40         | 154            | 2        | 14            |
| Riverine       | 4   | 0     | 0             | 0          | 2     | 1          | 2              | 148      | 0             |
| Maritime pine  | 4   | 0     | 0             | 2          | 0     | 62         | 50             | 0        | 62            |

| <b>KNN</b>     | Oak | Mixed | Norway spruce | Scots pine | Beech | Black pine | Calabrian pine | Riverine | Maritime pine |
|----------------|-----|-------|---------------|------------|-------|------------|----------------|----------|---------------|
| Oak            | 174 | 0     | 0             | 0          | 101   | 6          | 0              | 0        | 0             |
| Mixed          | 0   | 6     | 57            | 4          | 63    | 0          | 0              | 0        | 0             |
| Norway spruce  | 0   | 3     | 243           | 0          | 20    | 0          | 0              | 0        | 0             |
| Scots pine     | 0   | 0     | 13            | 57         | 72    | 0          | 0              | 0        | 0             |
| Beech          | 1   | 0     | 3             | 0          | 169   | 2          | 0              | 0        | 0             |
| Black pine     | 15  | 0     | 0             | 0          | 77    | 181        | 0              | 0        | 0             |
| Calabrian pine | 9   | 0     | 0             | 0          | 46    | 64         | 113            | 0        | 0             |
| Riverine       | 0   | 0     | 0             | 0          | 31    | 2          | 1              | 123      | 0             |
| Maritime pine  | 22  | 0     | 0             | 2          | 41    | 76         | 36             | 0        | 3             |
| <b>CART</b>    | Oak | Mixed | Norway spruce | Scots pine | Beech | Black pine | Calabrian pine | Riverine | Maritime pine |
| Oak            | 194 | 4     | 1             | 3          | 34    | 33         | 5              | 3        | 4             |
| Mixed          | 5   | 33    | 42            | 31         | 11    | 2          | 5              | 0        | 1             |
| Norway spruce  | 1   | 29    | 218           | 11         | 5     | 2          | 0              | 0        | 0             |
| Scots pine     | 1   | 18    | 7             | 78         | 11    | 17         | 6              | 0        | 4             |
| Beech          | 22  | 5     | 3             | 15         | 122   | 5          | 0              | 1        | 2             |
| Black pine     | 33  | 3     | 0             | 12         | 21    | 154        | 26             | 4        | 20            |
| Calabrian pine | 15  | 3     | 1             | 4          | 9     | 33         | 131            | 1        | 35            |
| Riverine       | 11  | 4     | 1             | 3          | 9     | 9          | 18             | 96       | 6             |
| Maritime pine  | 11  | 1     | 0             | 9          | 4     | 42         | 59             | 0        | 54            |

| <b>GTB</b>     | Oak | Mixed | Norway spruce | Scots pine | Beech | Black pine | Calabrian pine | Riverine | Maritime pine |
|----------------|-----|-------|---------------|------------|-------|------------|----------------|----------|---------------|
| Oak            | 234 | 1     | 0             | 4          | 11    | 27         | 1              | 2        | 1             |
| Mixed          | 3   | 39    | 48            | 21         | 17    | 1          | 0              | 0        | 1             |
| Norway spruce  | 0   | 20    | 231           | 5          | 8     | 1          | 0              | 1        | 0             |
| Scots pine     | 2   | 8     | 4             | 99         | 7     | 14         | 4              | 3        | 1             |
| Beech          | 12  | 3     | 1             | 4          | 151   | 4          | 0              | 0        | 0             |
| Black pine     | 38  | 0     | 0             | 10         | 8     | 182        | 30             | 0        | 5             |
| Calabrian pine | 24  | 0     | 0             | 2          | 5     | 33         | 125            | 4        | 39            |
| Riverine       | 16  | 1     | 1             | 1          | 2     | 0          | 2              | 133      | 1             |
| Maritime pine  | 12  | 0     | 0             | 4          | 2     | 36         | 66             | 2        | 58            |

| <b>Plurality</b> | Oak | Mixed | Norway spruce | Scots pine | Beech | Black pine | Calabrian pine | Riverine | Maritime pine |
|------------------|-----|-------|---------------|------------|-------|------------|----------------|----------|---------------|
| Oak              | 350 | 0     | 0             | 2          | 10    | 1          | 0              | 0        | 0             |
| Mixed            | 1   | 48    | 26            | 35         | 9     | 2          | 1              | 0        | 0             |
| Norway spruce    | 0   | 2     | 357           | 2          | 0     | 0          | 0              | 0        | 0             |
| Scots pine       | 0   | 3     | 19            | 323        | 6     | 10         | 2              | 0        | 0             |
| Beech            | 33  | 6     | 0             | 3          | 321   | 0          | 0              | 0        | 0             |
| Black pine       | 4   | 0     | 6             | 23         | 4     | 308        | 18             | 0        | 0             |
| Calabrian pine   | 1   | 0     | 1             | 3          | 3     | 31         | 308            | 2        | 12            |
| Riverine         | 0   | 0     | 0             | 0          | 2     | 3          | 1              | 142      | 0             |
| Maritime pine    | 1   | 0     | 1             | 2          | 0     | 26         | 65             | 0        | 55            |

| <b>LOP-ICSI</b> | <b>Oak</b> | <b>Mixed</b> | <b>Norway spruce</b> | <b>Scots pine</b> | <b>Beech</b> | <b>Black pine</b> | <b>Calabrian pine</b> | <b>Riverine</b> | <b>Maritime pine</b> |
|-----------------|------------|--------------|----------------------|-------------------|--------------|-------------------|-----------------------|-----------------|----------------------|
| Oak             | 359        | 0            | 0                    | 1                 | 2            | 1                 | 0                     | 0               | 0                    |
| Mixed           | 1          | 0            | 65                   | 38                | 15           | 1                 | 0                     | 2               | 0                    |
| Norway spruce   | 0          | 0            | 361                  | 0                 | 0            | 0                 | 0                     | 0               | 0                    |
| Scots pine      | 0          | 0            | 23                   | 324               | 7            | 7                 | 2                     | 0               | 0                    |
| Beech           | 42         | 0            | 5                    | 1                 | 314          | 1                 | 0                     | 0               | 0                    |
| Black pine      | 5          | 0            | 9                    | 22                | 3            | 308               | 15                    | 1               | 0                    |
| Calabrian pine  | 2          | 0            | 3                    | 3                 | 0            | 17                | 320                   | 16              | 0                    |
| Riverine        | 0          | 0            | 0                    | 0                 | 0            | 0                 | 0                     | 148             | 0                    |
| Maritime pine   | 1          | 0            | 42                   | 2                 | 0            | 22                | 66                    | 17              | 0                    |

| <b>LOP-PA</b>  | <b>Oak</b> | <b>Mixed</b> | <b>Norway spruce</b> | <b>Scots pine</b> | <b>Beech</b> | <b>Black pine</b> | <b>Calabrian pine</b> | <b>Riverine</b> | <b>Maritime pine</b> |
|----------------|------------|--------------|----------------------|-------------------|--------------|-------------------|-----------------------|-----------------|----------------------|
| <b>Oak</b>     | 351        | 0            | 0                    | 2                 | 6            | 4                 | 0                     | 0               | 0                    |
| Mixed          | 1          | 2            | 55                   | 42                | 19           | 2                 | 1                     | 0               | 0                    |
| Norway spruce  | 0          | 0            | 360                  | 1                 | 0            | 0                 | 0                     | 0               | 0                    |
| Scots pine     | 0          | 0            | 18                   | 327               | 8            | 8                 | 2                     | 0               | 0                    |
| Beech          | 34         | 0            | 2                    | 0                 | 326          | 1                 | 0                     | 0               | 0                    |
| Black pine     | 3          | 0            | 6                    | 18                | 4            | 315               | 17                    | 0               | 0                    |
| Calabrian pine | 1          | 0            | 0                    | 4                 | 0            | 20                | 329                   | 3               | 4                    |
| Riverine       | 0          | 0            | 0                    | 0                 | 1            | 0                 | 1                     | 146             | 0                    |
| Maritime pine  | 1          | 0            | 2                    | 2                 | 0            | 25                | 79                    | 0               | 41                   |

| <b>LOP-UA</b>  | Oak | Mixed | Norway spruce | Scots pine | Beech | Black pine | Calabrian pine | Riverine | Maritime pine |
|----------------|-----|-------|---------------|------------|-------|------------|----------------|----------|---------------|
| Oak            | 355 | 0     | 0             | 2          | 3     | 3          | 0              | 0        | 0             |
| Mixed          | 0   | 35    | 37            | 39         | 6     | 2          | 2              | 1        | 0             |
| Norway spruce  | 0   | 1     | 359           | 1          | 0     | 0          | 0              | 0        | 0             |
| Scots pine     | 0   | 1     | 18            | 331        | 4     | 7          | 2              | 0        | 0             |
| Beech          | 42  | 5     | 3             | 2          | 309   | 1          | 0              | 1        | 0             |
| Black pine     | 4   | 0     | 6             | 20         | 2     | 300        | 27             | 0        | 4             |
| Calabrian pine | 1   | 0     | 0             | 4          | 0     | 13         | 308            | 4        | 31            |
| Riverine       | 0   | 0     | 0             | 0          | 0     | 0          | 1              | 147      | 0             |
| Maritime pine  | 1   | 0     | 1             | 2          | 0     | 11         | 55             | 1        | 79            |

| <b>Stack-RF</b> | Oak | Mixed | Norway spruce | Scots pine | Beech | Black pine | Calabrian pine | Riverine | Maritime pine |
|-----------------|-----|-------|---------------|------------|-------|------------|----------------|----------|---------------|
| Oak             | 316 | 0     | 0             | 8          | 20    | 41         | 6              | 0        | 5             |
| Mixed           | 3   | 14    | 41            | 37         | 27    | 5          | 1              | 0        | 0             |
| Norway spruce   | 0   | 3     | 432           | 14         | 5     | 0          | 0              | 0        | 0             |
| Scots pine      | 15  | 0     | 18            | 415        | 110   | 13         | 4              | 1        | 0             |
| Beech           | 47  | 2     | 1             | 76         | 418   | 37         | 3              | 2        | 1             |
| Black pine      | 20  | 1     | 15            | 53         | 26    | 287        | 26             | 0        | 0             |
| Calabrian pine  | 16  | 0     | 1             | 7          | 0     | 93         | 472            | 3        | 36            |
| Riverine        | 6   | 0     | 2             | 3          | 1     | 4          | 12             | 117      | 2             |
| Maritime pine   | 6   | 0     | 0             | 1          | 1     | 39         | 67             | 0        | 40            |
